# Supplementary material for: Benefits of using genomic insulators flanking transgenes to increase expression and avoid positional effects
Source: PubMed Central journal article supplement (PMC6560062; doi:10.1038/s41598-019-44836-6), 2019-06-11

**Benefits of using genomic insulators flanking transgenes to increase expression and avoid positional effects**

---

Ana Pérez-González and Elena Caro\*

**Figure S1: Nucleotide sequences of MARs.**

>Rb7

TCGATTA AAAATCCAATTATATTTGGTCTAATTTAGTTTGGTATTGAGTAAAACAAATTCGAAC  
CAAACCAAAAATATAAATATATAGTTTTTATATATATGCCTTTAAGACTTTTTATAGAATTTTCTTT  
AAAAAATATCTAGAAATATTTGCGACTCTTCTGGCATGTAATATTTTCGTTAAATATGAAGTGCT  
CCATTTTTATTAACCTTTAAATAATTGGTTGTACGATCACTTTCTTATCAAGTGTTACTAAAATGC  
GTCAATCTCTTTGTTCTTCCATATTCATATGTCAAATCTATCAAATTTCTTATATATCTTTTTCG  
AATTTGAAGTGAAATTTTCGATAATTTAAAATTAATAGAACATATCATTATTTAGGTATCATAT  
TGATTTTTATACTTAATTAATAATTTGGTTAACTTTGAAAAGTGACATCAACGAAAAATTAGTC  
AAACGACTAAAATAAATAAATATCATGTGTTATTAAGAAAATTCTCCTATAAGAATATTTTAAT  
AGATCATATGTTTGTA AAAAAAATTAATTTTTACTAACACATATATTTACTTATCAA AATTTGA  
CAAAGTAAGATTA AATAATATTCATCTAACAAAAA AACCAGAAAATGCTGAAAACCCGG  
CAAACCGAACCAATCCAAACCGATATAGTTGGTTTGGTTTGATTTTGATATAAACCGAACCA  
ACTCGGTCCATTTGCACCCCTAATCATAATAGCTTTAATATTTCAAGATATTATTAAGTTAACGT  
TGCAATATCCTGGAAATTTTGCAAATGAATCAAGCCTATATGGCTGTAATATGAATTTAAAA  
GCAGCTCGATGTGGTGGTAATATGTAATTTACTTGATTCTAAAAAATATCCCAAGTATTAATA  
ATTTCTGCTAGGAAGAAGGTTAGCTACGATTTACAGCAAAGCCAGAATACAAAGAACCATAAAA  
GTGATTGAAGCTCGAAATATACGAAGGAACAAATATTTTTAAAAAATACGCAATGACTTGGAA  
ACAAAAGAAAGTGATATATTTTTTTGTTCTTAAACAAGCATCCCCTCTAAGAATGGCAGTTTTTC  
CTTTGCATGTA ACTATTATGCTCCCTTCGTTACAAAATTTTGGACTACTATTGGGA ACTTCTTC  
TGAAAATAGT

>chiMARs

GAATTCGGATCCGGAGGCTCAGAAAACGGCAGTTGGGCACTGCACTGCCCGGTGATGGTGCC  
ACGGTGGCTCCTGCCACCTTCTTTGATATCACTCTGTTGTATTTTATCTCTTCTTGCTGATGAA  
AGGATATAACAGTCTGTGAGGAAATACTTGGTATTTCTTCTGATCAACGTTTTTGTAAAGTAATG  
TTGAATATTGGATAAGGCTGTGTGTCCTTTGTCTTGGGAGACAAAGCCACAGCAGGTGGTG  
GTTGGGGTGGTGGCAGCTCAGTGACAGGAGAGGTTTTTTTTGCCTGTTTTTTTTTTTTTTAAG  
TAAGGTGTTCTTTTTCTTAGTAAAATTTCTACTGGACTGTATGTTTTGACAGGTCAGAAACATT  
TCTTCAAAGAAGAACCTTTTGAAACTGTACAGCCCTTTCTTTTATTCCCTTTTTGCTTTCTGT  
GCCAATGCCTTTGGTTCTGATTGCGTTATGGAAAACGTTGATCGGAACTTGAGGTTTTTATTTA  
TAGTGTGGCTTGAAAGCTTGGATAGCTGTTGTTACACGAGATACCTTATTAAGTTTAGGCCAG  
CTTGATGCTTTATTTTTCCCTTCGAAGTAGTGAGCGTTCTCTGGTTTTTTTCTTTGAAACTGG  
CGAGGCTTAGATTTTTCTAATGGGATTTTTTACCTGATGATCTAGTTGCATACCCAAATGCTTG  
TAAATGTTTTCTAGTTAACATGTTGATAACTTCGGATTTACATGTTGTATATACTTGT CATCTG  
TGTTTCTAGTAAAAATATATGGCATTATAGAAATACGTAATTCCTGATTTCTTTTTTTTTTTAT  
CTCTATGCTCTGTGTGTACAGGTCAAACAGACTTCACTCCTATTTTTATTTATAGAATTTTATAT  
GCAGTCTGTGTTGGTTCTTGTGTTGTAAGGATACAGCCTTAAATTTCTAGAGCGGTGCTCAA  
TAAGGCGGGTTGTCACATGGGTTCAAATGTAAAACGGGTACGTTTGGCTGCTGCCTTCCCAG  
ATCCAGGACACTAACTGCTTCTGCACTGAGGTATAAATCGCTTCAGATCCCAGGGAAGTGTA  
GATCCACGTGCATATTCTTAAAGAAGAATGAATACTTTCTAAAATATTTTGGCATAGGAAGCA  
AGCTGCATGGATTTGTTTGGGACTTAAATATTTTGGTAACGGAGTGCATAGGTTTTAAACAC  
AGTTGCAGCATGCTAACGAGTCACAGCGTTTATGCAGAAGTGATGCCTGGATGCCTGTTGCAG  
CTGTTTACAGCACTGCCTTGCAGTGAGCATTGCAGATAGGGGTGGGGTGCTTTGTGTGCTGTT  
CCCACACGTTGCCACACAGCCACCTCCCGGAACACATCTCACCTGCTGGGTACTTTTCAAACCA

TCTTAGCAGTAGTAGATGAGTTACTATGAAACAGAGAAGTTCCTCAGTTGGATATTCTCATGG  
GATGTCTTTTTTCCCATGTTGGGCAAAGTATGATAAAGCATCTCTATTTGTAAATTATGCACTT  
GTTAGTTCCTGAATCCTTTCTATAGCACCCTTATTGCAGCAGGTGTAGGCTCTGGTGTGCGCT

>TBS

TTCCTAACACCTGGAGAACCTTTTATGTACTTCACAACCCTCAATGCTGCTTCCAGGTGTGACT  
GTTTGGGCTGCTGCATGAATTGACTCAGCACCTGCACTGCAAAGCTTATATCTGGCCTTGTGAT  
TGCAAGTAGAGAAGCTTTCCCACAGTCTCTGATAGGATCCCACATCCTCTAACTCTGCATCA  
TCAGTCTTTCCTAAGTGCTTGTCAATTTCTACAGTAGTCAGCCTTTGGTTCTGTTCCATTGGGGT  
TGACTGCTGCTGCAGCCTCCAGACCAACACCTGATATCAGTTCAGTGCATACTTCTCTGG  
TTCAGTAGGATCCCTTTTCTGATCTCAGCACCTCAATGCCTAAGAAGTATTTTGTCTCCCAA  
ATCTTTCATCTTCAAATGCTGATGCAGGGTGCCTTTGCTTCTGAAATCAAACATTGCTGCTG  
CCTGCTATTAACAGATCATCCACGTAATCAGGATTATGACAAGGTCAGTCCCCTCTTTTTGG  
TAAACAAGGAGTGATCATAAGCACTTTGCATAAAACCAGCCTGCATAAGGACAGTGGTAAGC  
TTGATGTTCCACTGCCTTGATGCTTGTAAACCATAGAGGGATTCAACAGCCTGCACACTTT  
GGTCGCCCCCTGGCTGTGAAAACCTGAGGCAGAGACATATAAACTTCTTCCATGAGGTCACC  
TTGTAGAAAAGCATTGTTGACATCCATCTGGAAAAGGAACCAGCCTTTGGAAGCAGCAACAG  
ATATGACAGCCTTACAGTGACCATTTTGGCCACTGGAGAAAAGGTTTCATGGTAGTCAAGGC  
CTTCTTGCTGAGTGTATCCCTTGGCCACTAGCCTTGCCTTAAACCTGTCAACTTACCATTAGCT  
TTGTATTTAATTTGTACACCTATTTGGACCCTATAGGCTGTTTACCAGGGGGGTAAAGGGACA  
ATCCCCCAGGTGTTATTATCCTCAAGAGCCTGTATCTCAAGGGACATAGCCTCCATCCATTTCT  
CATCTTGGGCTGCTTCTTTGAAGGATCTAGGTTTCAAGTATAAGTGGAGAAAAGCACTTAAATAAG  
CTTGATAGTGAACAGGCAAGTGATCATAAGGAAACATAGTTGGCTATAGGGTATGGGACATCC  
CCAGAGCCTTTGTTTGTGTCACAAAGTCTTGGCCAGATGGGAGGACCTGCATTGCGTTTA  
GGTCTAGTGTGCAGGTTGGCTGGAAGTGGAGAGGAATCAGCTACAGCAGGATGGTGCTCAA  
ATTCAGCATTGCTAGGTCAGGCTCAGCTGACTCAACTGACTCTGCAGGGGCATGCAGCCGGC  
CTGAAGGTGCAGCTTCAAGTGAATGGTATGATTTTGGGTAGAATGAGTCCCCAAAGTGATAT  
CCTCATTGGCCTCTACATTGTCAGGAATAAGAACTGGAGTATCATCATCATCAGTATGAAAGCT  
GGAAGGAAAAATATCATTATACACTAGCTGCAAGGCTGTATCTTCGGAGCTAAGTGAACCTGC  
TTGAGTGAACATATCAGGTTTCAAGGAGATGGACTCTTTGAAAGGGAAAGAATATGTGAGTG  
ATTCATACACAGCATCTCTTTCCAATAGTATGACCGATCATTGTGGGTATAATGGTAGATGCCC  
GGGACCAAGTCGATAGAAATTCAGTATTTTGCACGAAAAACAGGACAGATTCAAGTTAAGTT  
ATGAAATTCTCTGAAAACACTACATCCCCGCTCACTATGATCACCTTATTATCCAAGTCATACAAC  
TGTAACCCTTTGAGTCTCAGAATAACCAATGAAGATGGTTTGTGGTCTAGGTGCAAGTTT  
GTCACCTTTGGCAGTGTTGCTGCAAAAGCAAGACACCCAAACACTCTCAGATGATCAAGCTT  
GGCATGTTTCTGATAGAGTAGTTCATATGGACATTTGCCTTGTAAAGATTGGAGTAGGAAGTCT  
ATTGATCAGGTATACAGCAGTCTTGACACAATCTCCCCAAAACCTGGTAGGTACACCACTCTG  
AAACTTAAGTGCCCTTGCCATTTCAAGGATGTGTCTGTGCTTCTCTCCACAACACCATTTTGT  
GTGGTGTGTAGGGACAGCTACTTTGATGAACAATCCAAGAGAGGCCAGCAACTCATTACAA  
CTT

>At S/MAR10

TGGCTATTGTTGTTATCATCAAAATCTATATTGATACTATTATACTCGATATGTTATAGACTTTA  
TTAAAAAAACTTTGTTTGTTCAGAAAGTGGATTTTAAATCAAATTAATTGTGATGATTAC  
AATGTCAATTGGTTATGCAAGATATTAATTAATATGTTTAAAGATTTTCACTTTTAAATAAGTAAA  
ATAAAATACGTCAAAAAAATTTCTAAAGATAATGCCAAAAAGGTTAAATTATAGAAATTTAAA  
CTAAAATATATTTAAAGTTGACTTAAAAATGCAATGTTGACCACCGACCTAGGGGAAAAACAAA

TTTACCGTATCTGGGATAGAATCTCTTCTGTATCATCTCAGATAAAGATTACTACATAAACACA  
CTTTACAGTTTTACGACGCCAAAATTCAATTCCTGGAGATTA AAAACCCTAAAACAAACTG  
GCGATTGATTTTCCCTCCCAATTCAAATCATCTCTTAATCTTCTTCTCACTATCCTCTCAA  
TTCGCCGCCGATCTCCATCAATTTGATTTCTCGCACCGAAATTCGACTTTTCATCTCCTATCG  
ACGAAACCCTAATTTTTCACACTCCAGAAATCGAACTTTGACGACGATGTTAATGGCTAAACCC



4

### Control 3414

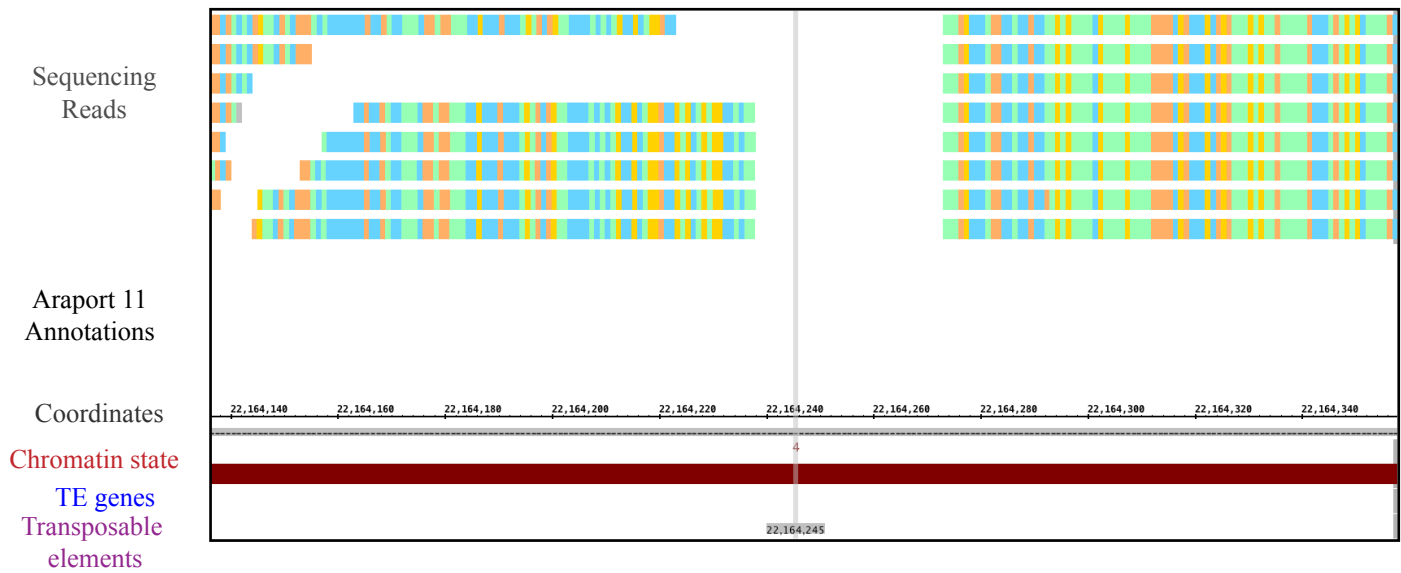

5

### AtS/MAR10 0101

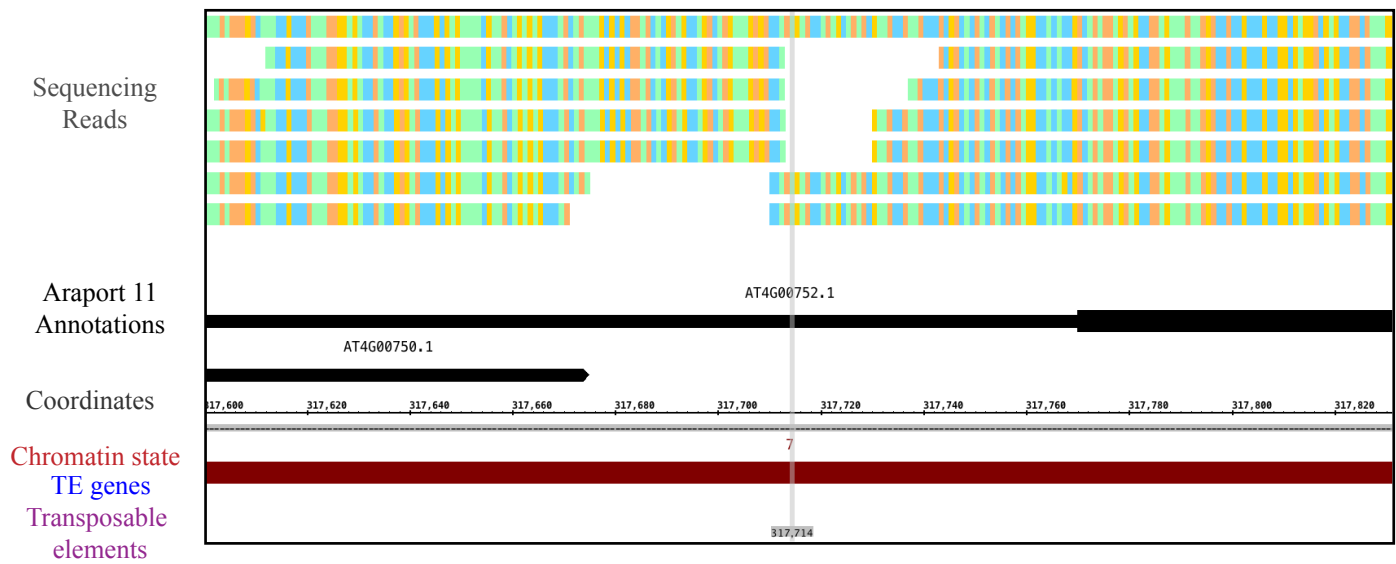

6

### AtS/MAR10 1607

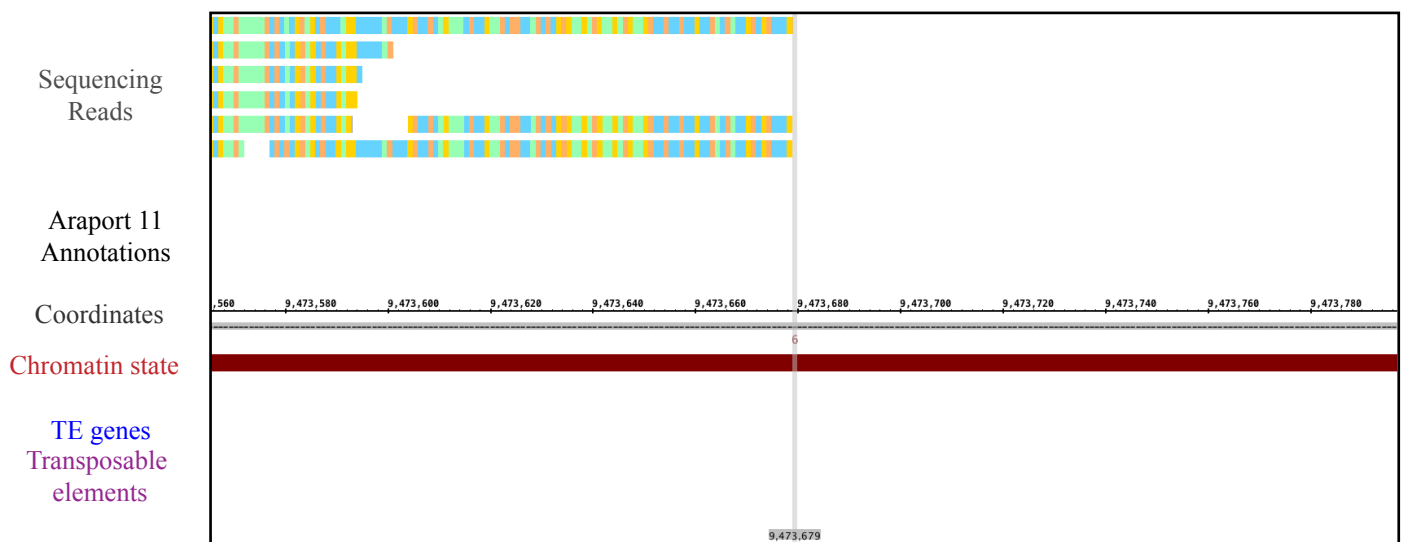

7

AtS/MAR10 2308

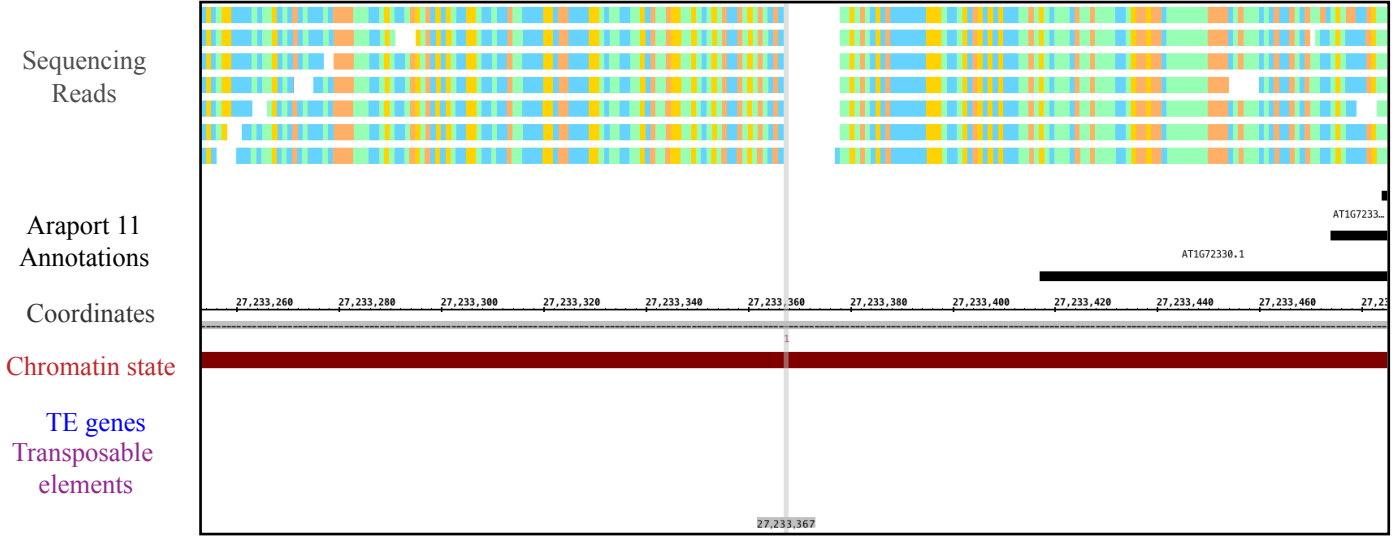

8

AtS/MAR10 4101

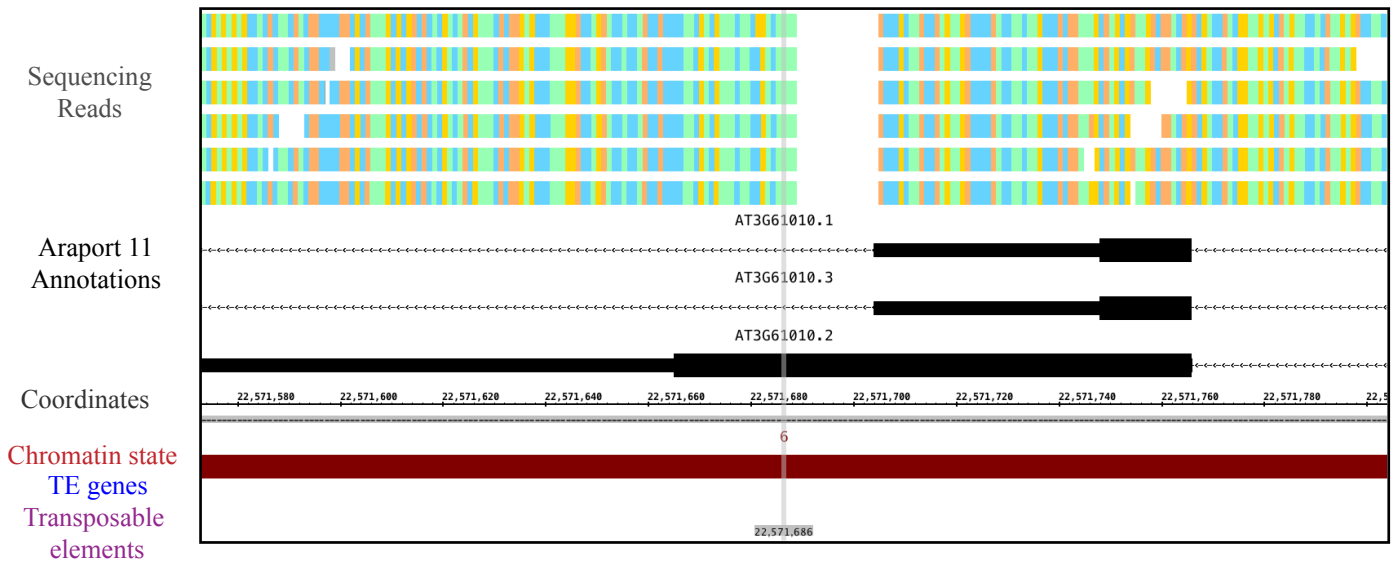

9

AtS/MAR10 4203

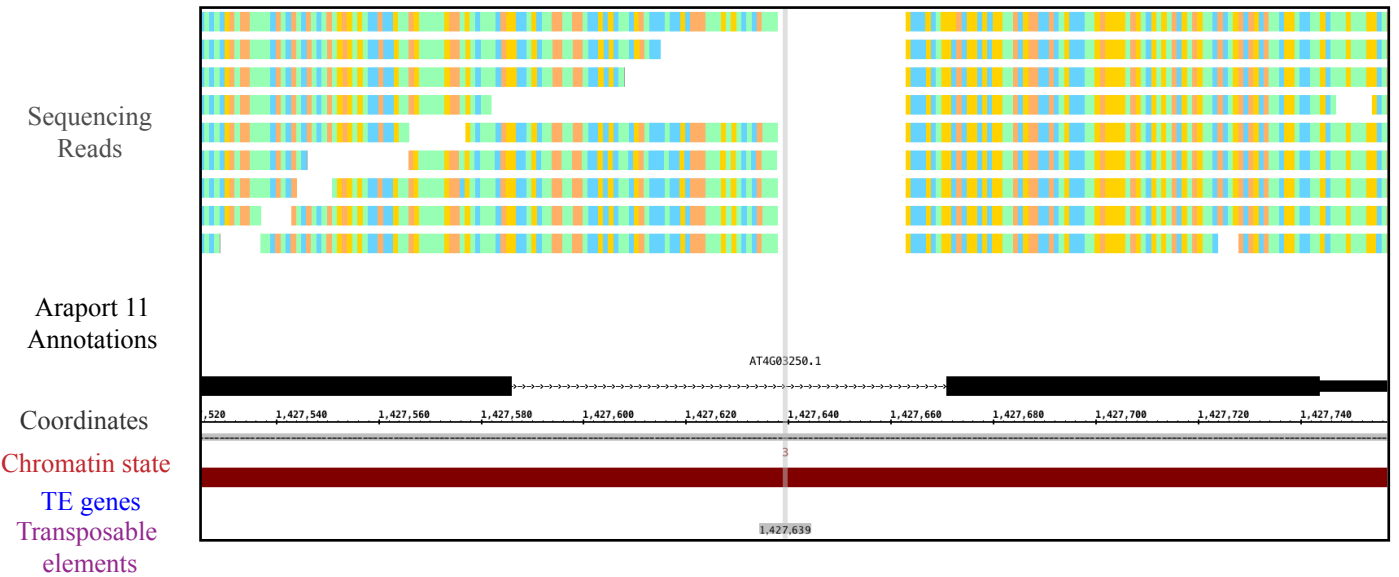

10

**Rb7 0502**

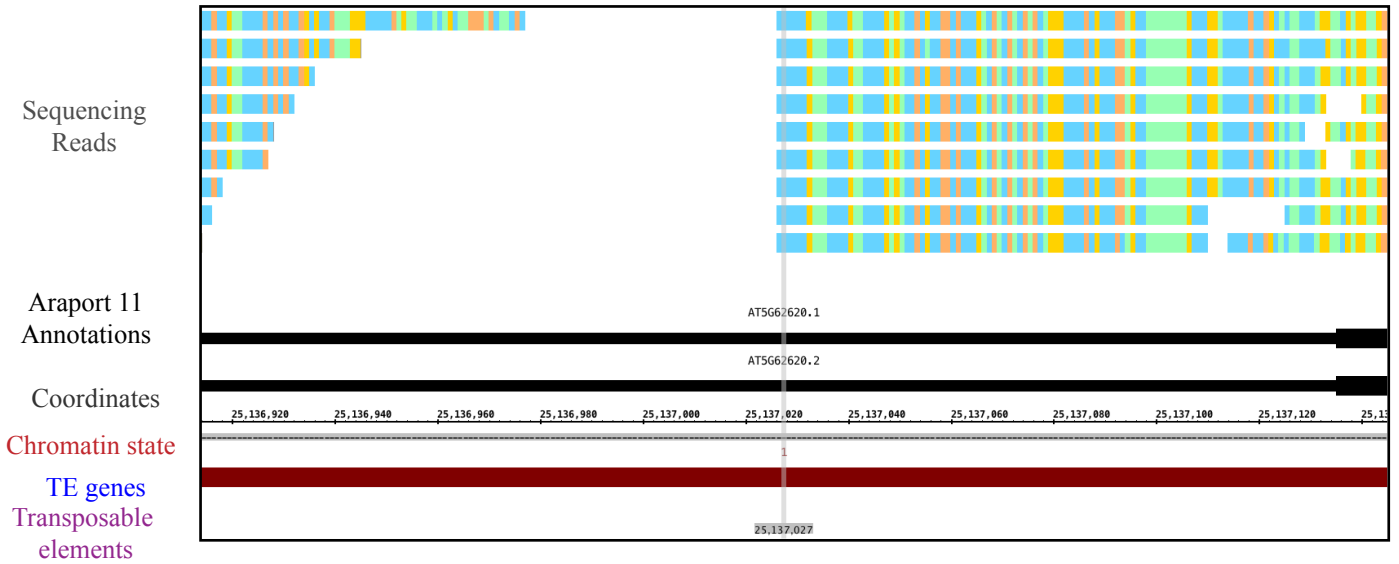

11

**Rb7 0902**

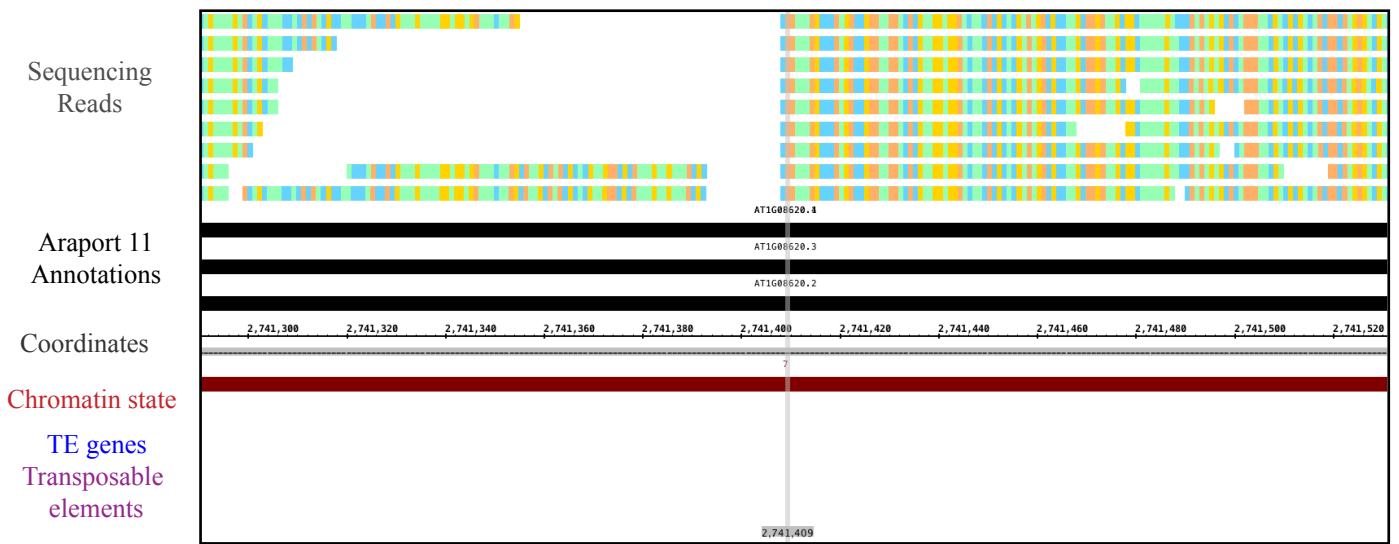

12

**Rb7 1001**

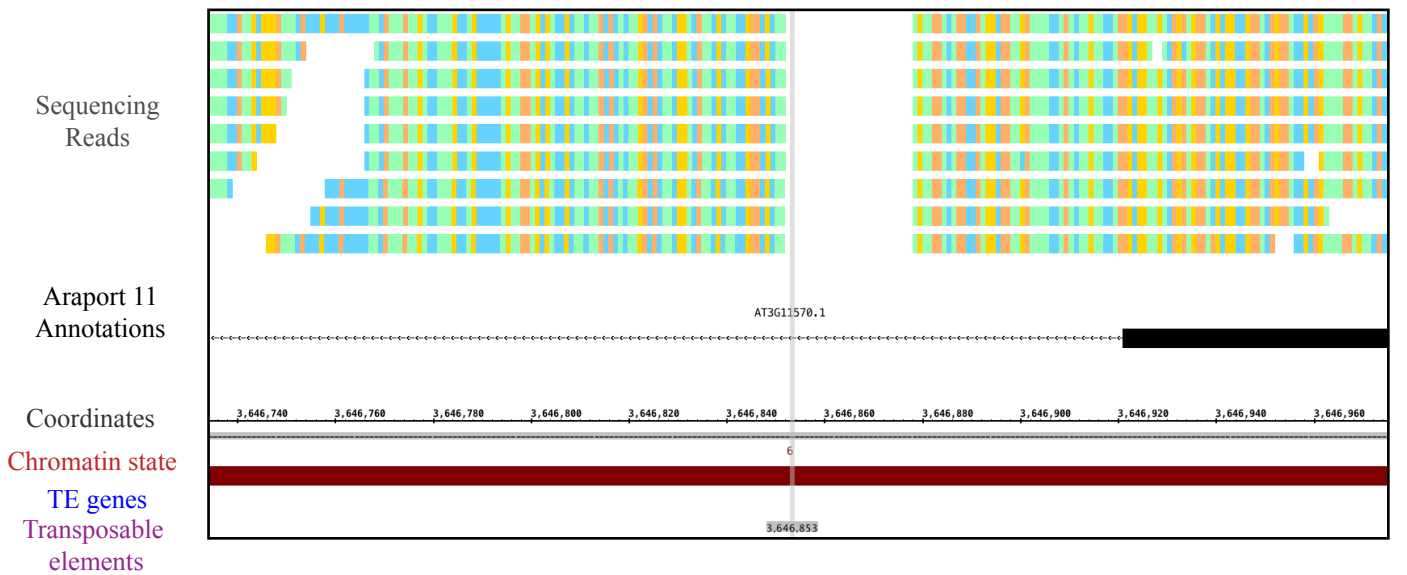



13

**Rb7 2707**

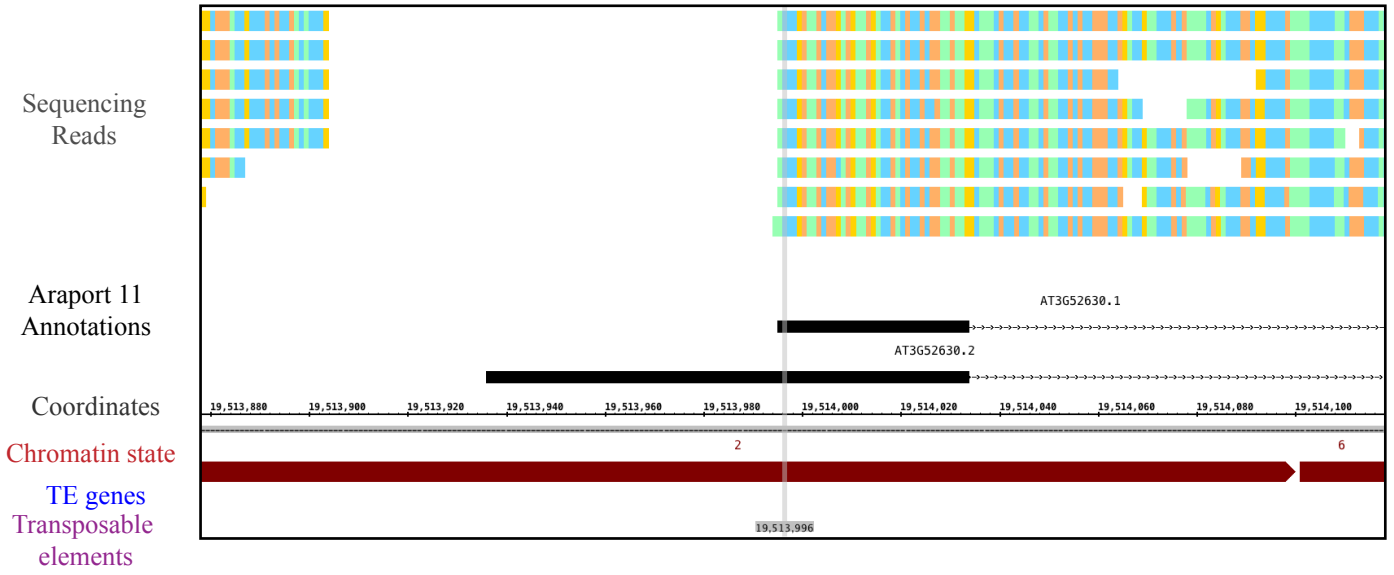

14

**Rb7 4202**

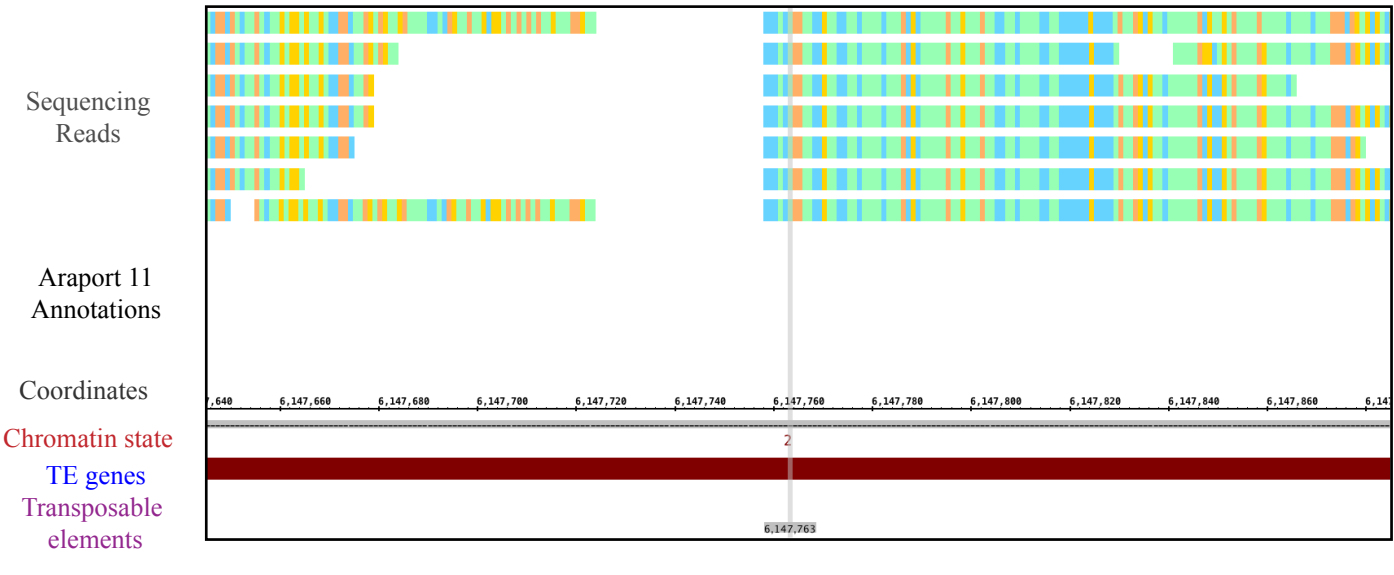

15

**TBS0403**

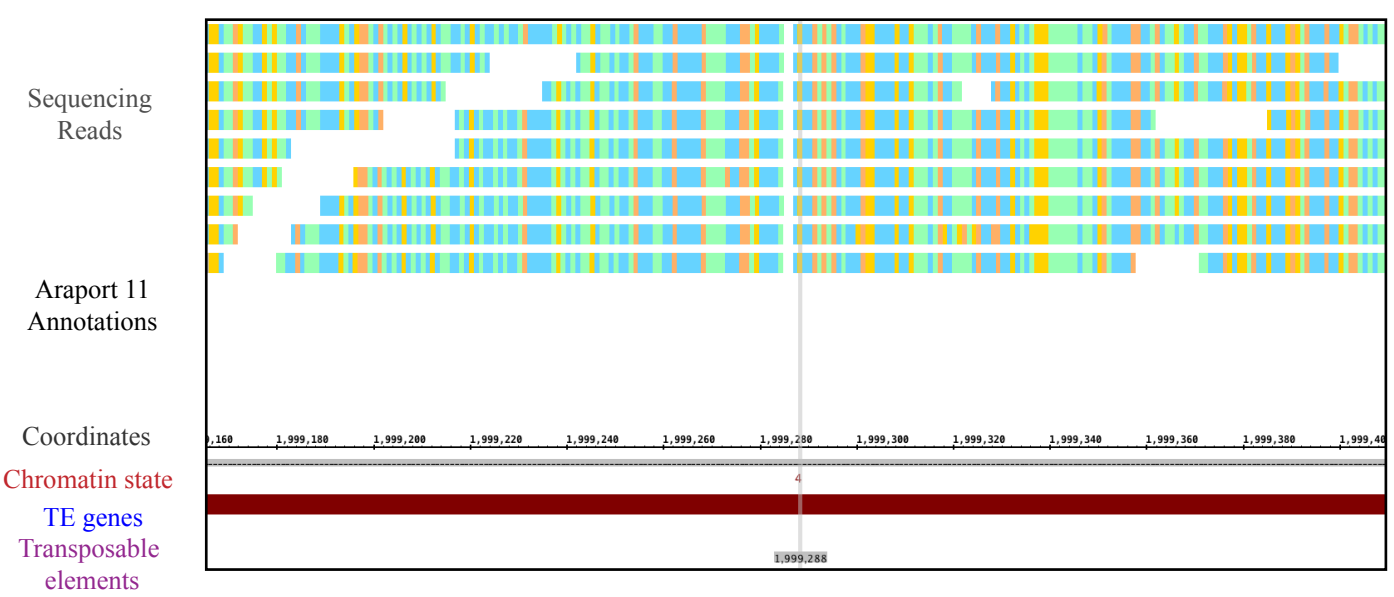

16

### TBS 1109

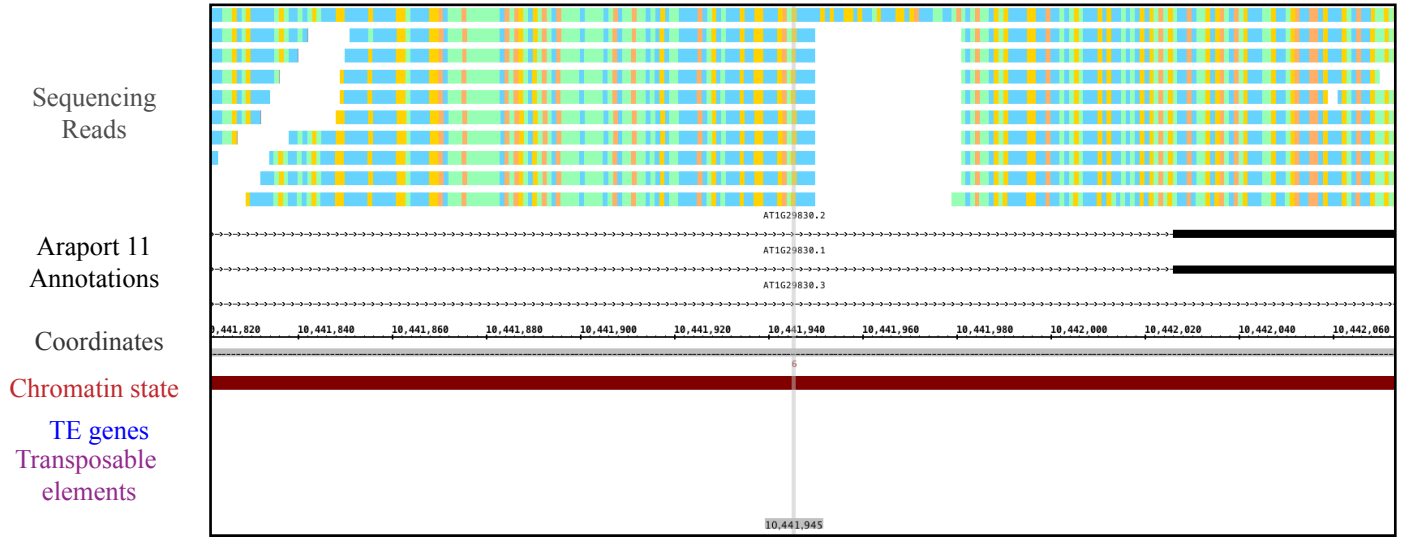

17

### TBS 1503

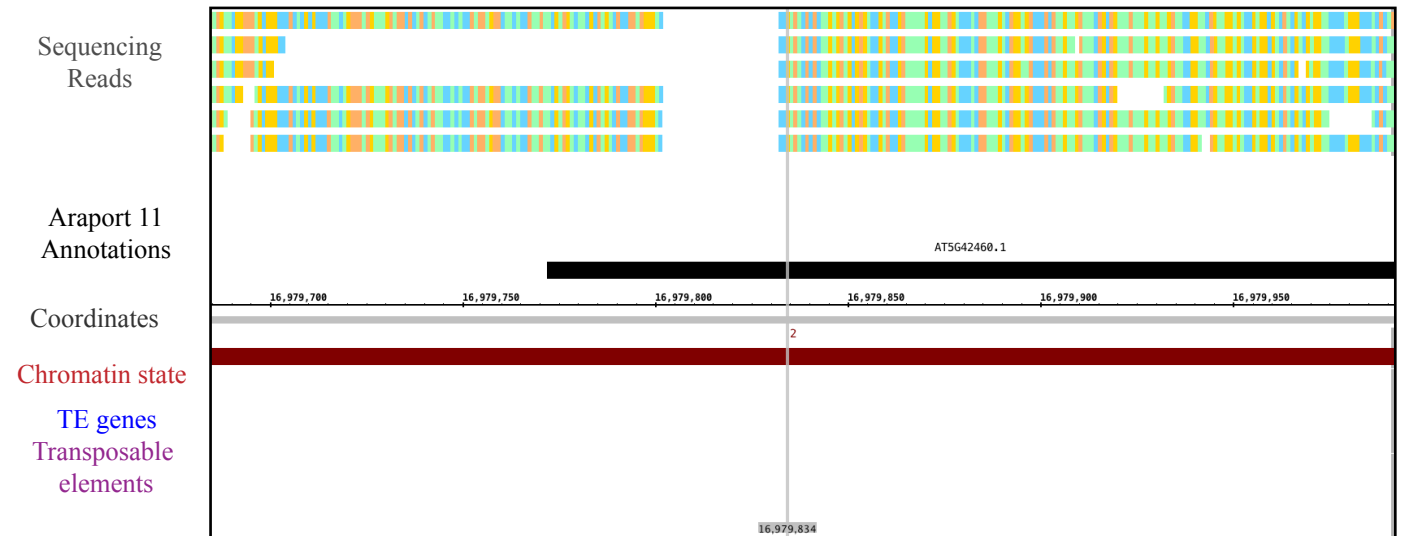

18

### TBS 1806

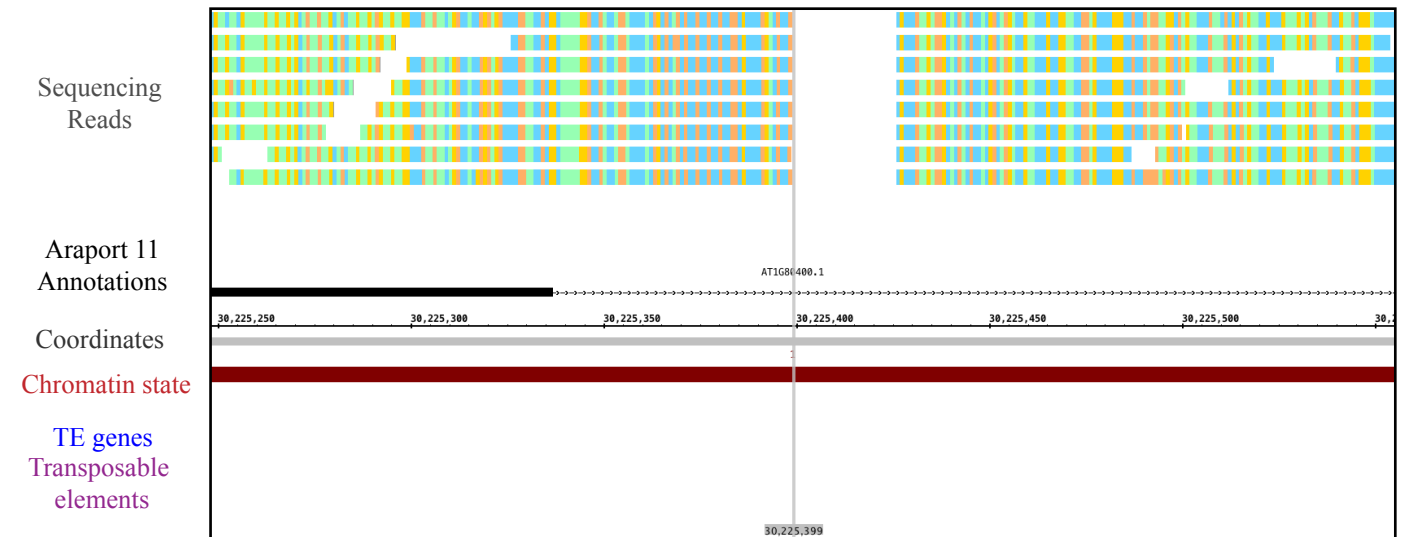

19

chiMARs 0112

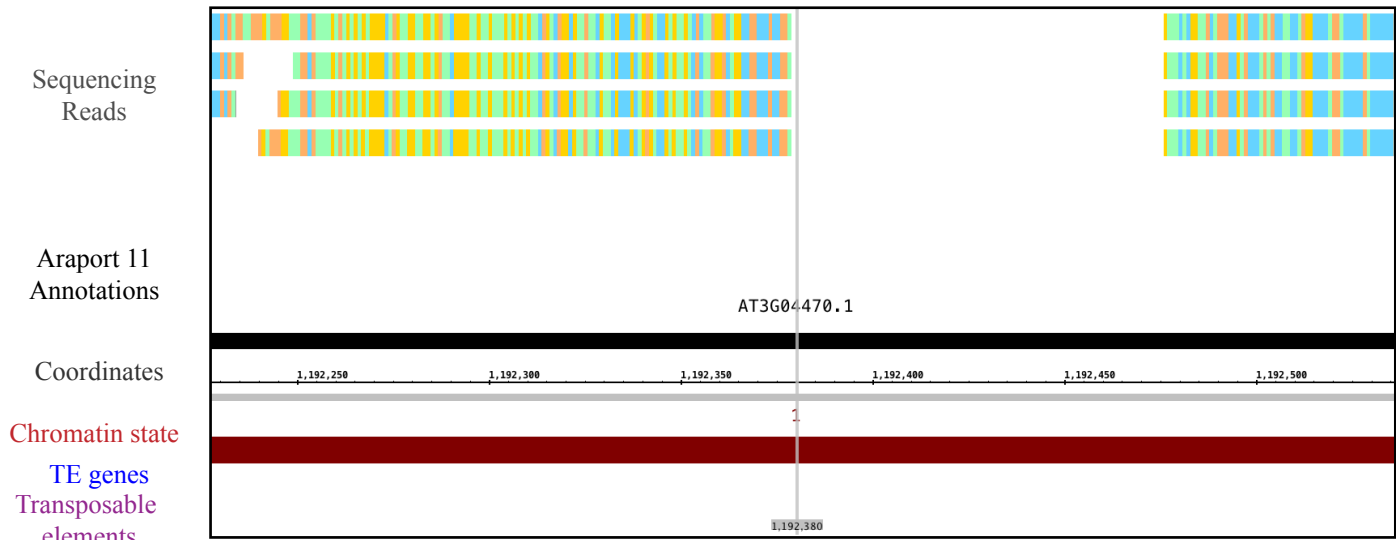

20

chiMARs 0613

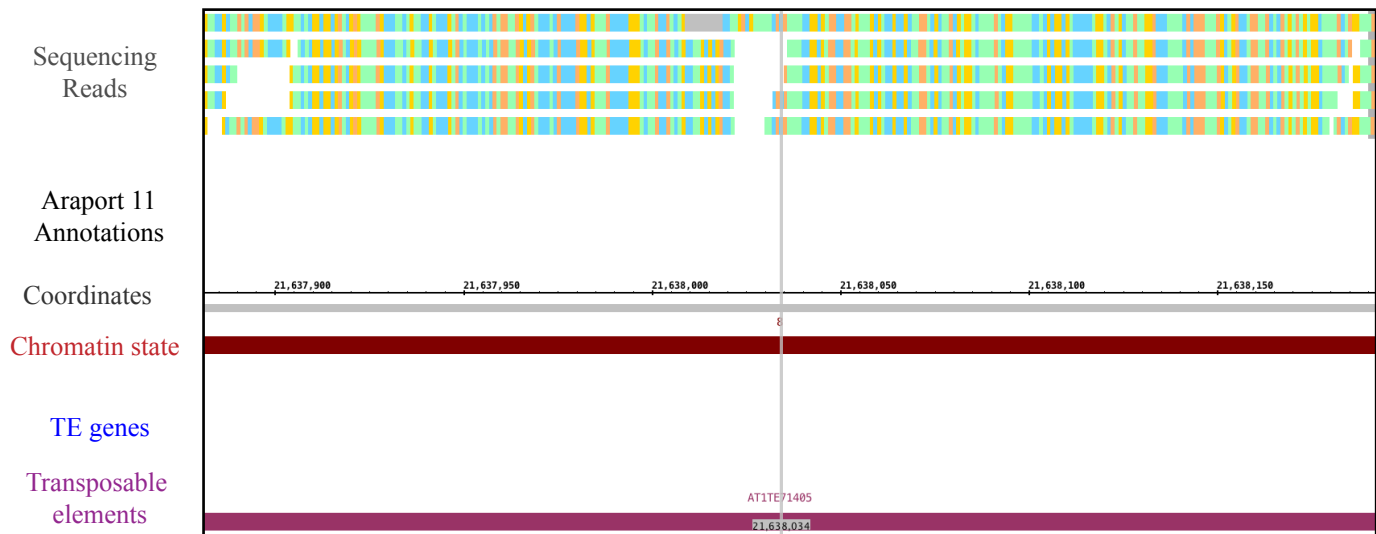

21

chiMARs 0711

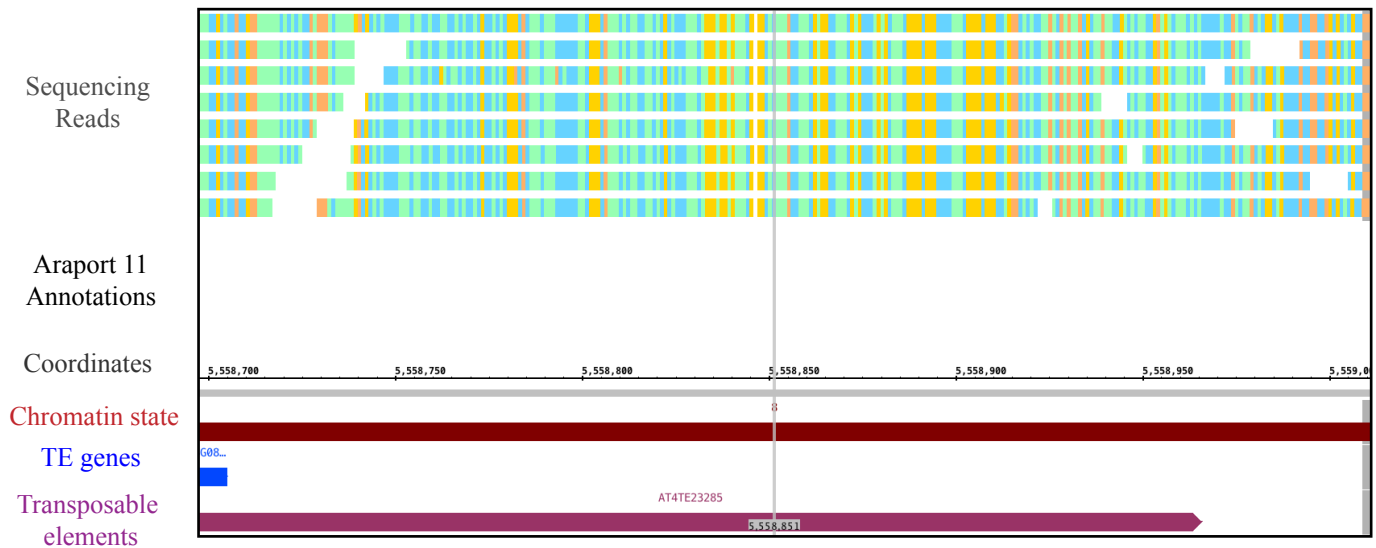

Supplement: 41598_2019_44836_MOESM1_ESM.pdf [file 41598_2019_44836_MOESM1_ESM.pdf]
